# Supplementary material
Source: PubMed Central journal article supplement (PMC3242734)
Supplement: NIHMS333069-supplement-01.pdf [file NIHMS333069-supplement-01.pdf]

Supporting Information

**Physically Associated Synthetic Hydrogels with Long-Term Covalent  
Stabilization for Cell Culture and Stem Cell Transplantation**

*Jianjun Zhang<sup>1,4</sup>, Talar Tokatlian<sup>1</sup>, Jin Zhong<sup>2</sup>, Quinn KT Ng<sup>1</sup>, Michaela Patterson<sup>3</sup>,  
Bill Lowry<sup>3</sup>, S. Thomas Carmichael<sup>2</sup>, Tatiana Segura<sup>1</sup> \**

<sup>1</sup>Department of Chemical and Biomolecular Engineering, University of California,  
Los Angeles, CA 90095, USA.

<sup>2</sup>Department of Neurology, University of California, Los Angeles, CA 90095, USA.

<sup>3</sup>Department of Molecular, Cell and Developmental Biology, University of California,  
Los Angeles, CA 90095, USA.

<sup>4</sup>Beijing University of Chemical Technology, Beijing 100029, PR China (current  
location).

[\*] Prof. Tatiana Segura. Corresponding-Author

<sup>1</sup> Department of Chemical and Biomolecular Engineering, University of California,  
Los Angeles, Los Angeles, CA 90095, USA

E-mail: [tsegura@ucla.edu](mailto:tsegura@ucla.edu)

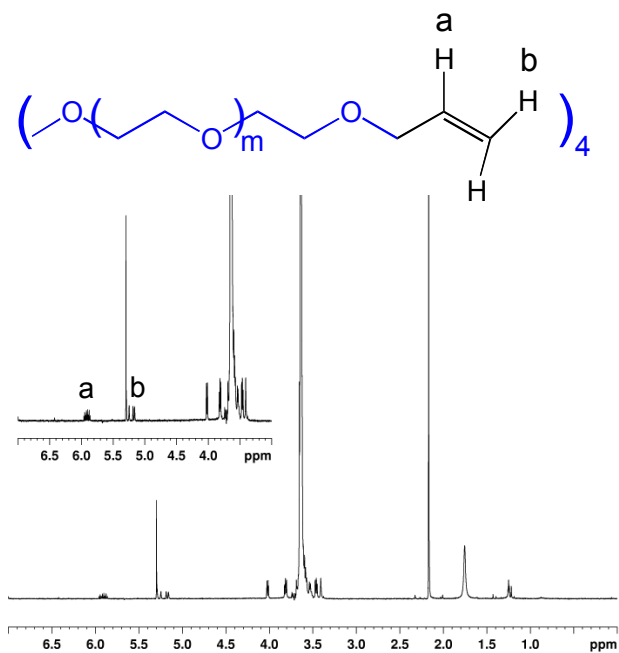

**Figure S1.**  $^1\text{H}$  NMR spectra of PEG-allyl ether using  $\text{CDCl}_3$  as solvent.  $\delta=3.39\text{-}3.89$  (broad, PEG chain protons), 5.85-5.98 (m, 1H,  $-\text{CH}_2\text{OCH}_2\text{CH}=\text{CH}_2$ ), 5.15-5.30 (m, 2H,  $-\text{CH}_2\text{OCH}_2\text{CH}=\text{CH}_2$ ).

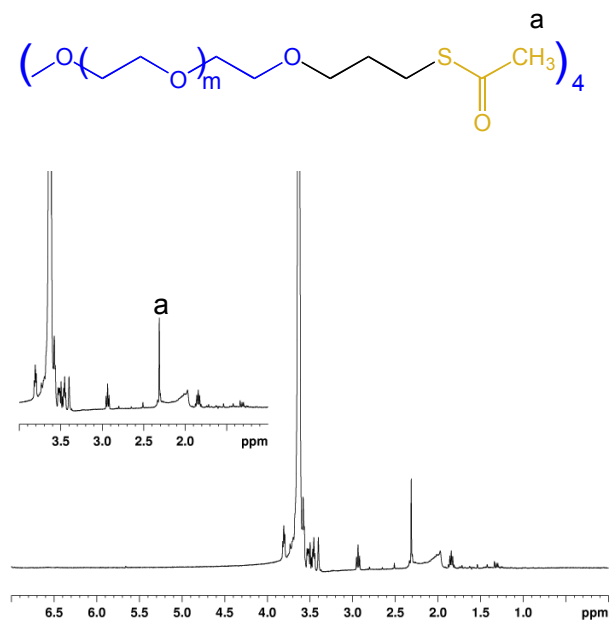

**Figure S2.**  $^1\text{H}$  NMR spectra of PEG-thioacetate using  $\text{CDCl}_3$  as solvent.  $\delta=1.81\text{-}1.9$  (q, 2H,  $-\text{OCH}_2\text{CH}_2\text{CH}_2\text{S}-$ ), 2.35 (s, 3H,  $-\text{SCOCH}_3$ ), 2.92-2.97 (t, 2H, -

OCH<sub>2</sub>CH<sub>2</sub>CH<sub>2</sub>S-), 3.39-3.89 (broad, PEG chain protons).

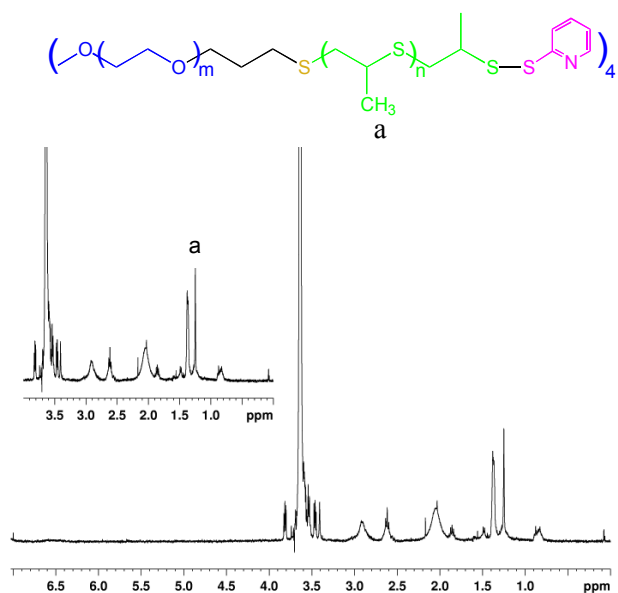

**Figure S3.** <sup>1</sup>H NMR spectra of PEG-PPS (i.e. (PEG<sub>113</sub>-PPS<sub>5</sub>)<sub>4</sub>) using CDCl<sub>3</sub> as solvent. δ=1.35-1.45 (d, CH<sub>3</sub> in PPS chain), 1.81-1.9 (broad q, 2H, -OCH<sub>2</sub>CH<sub>2</sub>CH<sub>2</sub>S), 3.6-3.7 (broad PEG chain protons).

Note: Depending on the moles of polypropylene sulfide monomer used, PEG arms were modified with 5 or 8 PPS (i.e. (PEG<sub>113</sub>-PPS<sub>5</sub>)<sub>4</sub> or (PEG<sub>113</sub>-PPS<sub>8</sub>)<sub>4</sub>, respectively). However, since the solubility of (PEG<sub>113</sub>-PPS<sub>8</sub>)<sub>4</sub> was extremely low and could not be used to consistently form homogeneous bulk hydrogels.

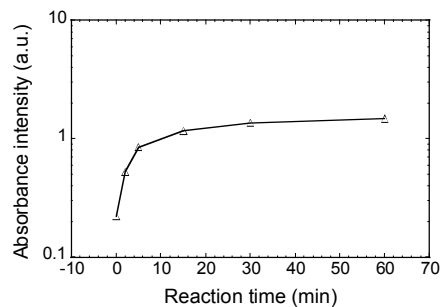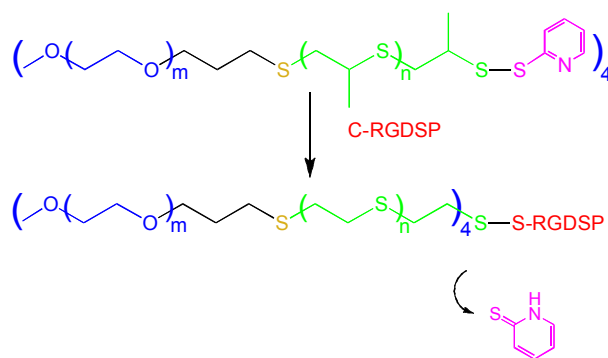

$$\frac{\Delta A_{342\text{nm}} \times \text{Mw of Polymer}}{8080 \text{ mg/mL of Polymer}} = 0.626$$

**Figure S4.** The degree of modification of RGD onto PEG-PPS was monitored by the release of 2-pyridine dithione (absorbance at 342nm), and calculated using the above formulation. The reaction reached a plateau after 1 hour and the coupling efficiency of RGD on four-arm PEG-PPS was ~15%.

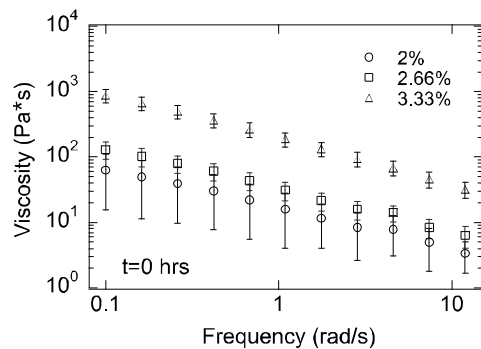

**Figure S5.** The viscosity of (PEG<sub>113</sub>-PPS<sub>5</sub>)<sub>4</sub> hydrogels was obtained as a function of shear rate using a strain-controlled Physica MCR Anton Paar rheometer. Although increasing copolymer concentration was found to increase the viscosity, viscosity decreased with increasing shear rate for all copolymer concentrations, indicating a shear-thinning fluid.

**Table S1.** Network structure parameter of PEG-PPS hydrogels with incubated in cDMEM in the presence of cells for various time.

| PEG-PPS    | G (Pa)  | $\nu_0$ (mol / m <sup>3</sup> ) | Mc (10 <sup>4</sup> g / mol) |
|------------|---------|---------------------------------|------------------------------|
| 2%-0h      | 17.28   | 0.0069                          | 289.85                       |
| 2%-336h    | 701.73  | 0.2833                          | 7.06                         |
| 2.66%-0h   | 30.25   | 0.0122                          | 218.03                       |
| 2.66%-12h  | 206.45  | 0.0833                          | 31.93                        |
| 2.66%-72h  | 572.73  | 0.2312                          | 11.50                        |
| 2.66%-168h | 789.45  | 0.3187                          | 8.34                         |
| 2.66%-336h | 989.64  | 0.3995                          | 6.65                         |
| 3.33%-0h   | 193.28  | 0.0780                          | 42.69                        |
| 3.33%-336h | 1492.70 | 0.6026                          | 5.5260                       |

**Equation 1**

$$Mc(g/mol) = \frac{\rho(g/m^3)}{\nu_0(mol/m^3)}$$

**Equation 2**

$$\nu_0(mol/m^3) = \frac{G(Pa)}{k(J/K) * NA(/mol) * T(K)}$$

$$\nu_0(mol/m^3) = \frac{G(Pa)}{1.38 * 10^{-23} (J/K) * 6.02 * 10^{23} (/mol) * 298.15(K)}$$

$$= \frac{G(N/m^2)}{1.38 * 10^{-23} (N * m/K) * 6.02 * 10^{23} (/mol) * 298.15(K)}$$

From dynamic shear rheology of data taken in the plateau temperature regime, an equilibrium modulus can be determined. Through the theory of rubber elasticity a average molecular weight between cross-linking points can be determined by using equation 1 and 2. Here, Mc is the average molecular weight between cross-linking points,  $\rho$  is the polymer densities in the hydrogel,  $\nu_0$  is the effective network chain density, G is the equilibrium modulus (in the calculation, we used average storage modulus G' as the equilibrium modulus), k is Boltzmann constant, N<sub>A</sub> is Avogadro's number.

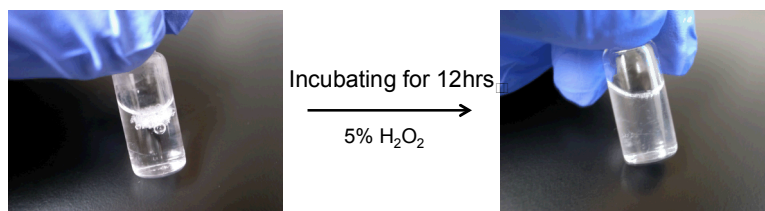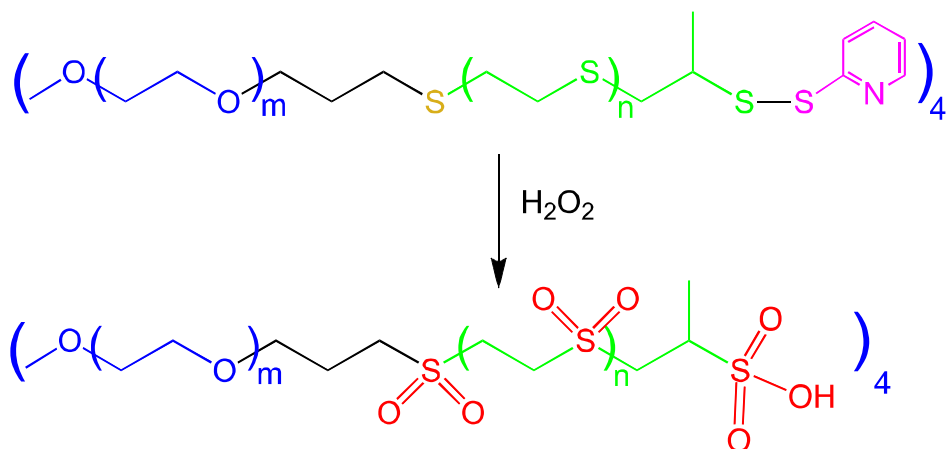

**Figure S6.** 2.66% (PEG<sub>113</sub>-PPS<sub>5</sub>)<sub>4</sub> hydrogels previously incubated in PBS for 336 hours were treated with hydrogen peroxide (H<sub>2</sub>O<sub>2</sub>). The hydrogels degraded completely in 12 hours. Oxidation resulted in hydrophilic sulfones which were not able to self assemble.
